# Supplementary material for: Neddylation pattern indicates tumor microenvironment characterization and predicts prognosis in lung adenocarcinoma
Source: Front Cell Dev Biol. 2022 Sep 13;10:979262. doi: 10.3389/fcell.2022.979262 (PMC9513323; doi:10.3389/fcell.2022.979262)
Supplement: Supplementary file 4 [file Table1.XLSX]

## Sheet: Additional file 3 Table S1
ID	Description	GeneRatio	BgRatio	pvalue	p.adjust	qvalue	geneID	Count
hsa04110	Cell cycle	29/158	126/8145	9.26803e-24	1.83507e-21	1.73654e-21	ORC1/TTK/CDC6/CCNA2/BUB1/CDC20/CCNB2/MAD2L1/PLK1/MCM6/CCNB1/CDK1/BUB1B/MCM2/CDC45/ESPL1/CHEK1/CDC25A/CDC25C/MCM4/ORC6/PKMYT1/PCNA/MCM7/CDC7/CCNE1/E2F1/E2F2/PTTG1	29
hsa03030	DNA replication	10/158	36/8145	9.34811e-10	9.25463e-08	8.7577e-08	MCM6/MCM2/FEN1/RFC4/PRIM1/MCM4/PCNA/MCM7/RNASEH2A/POLE2	10
hsa04114	Oocyte meiosis	15/158	131/8145	2.91928e-08	1.92673e-06	1.82327e-06	BUB1/CDC20/CCNB2/MAD2L1/PLK1/SGO1/CCNB1/CDK1/ESPL1/CDC25C/AURKA/FBXO5/PKMYT1/CCNE1/PTTG1	15
hsa04914	Progesterone-mediated oocyte maturation	11/158	102/8145	4.02477e-06	0.000199226	0.000188529	CCNA2/BUB1/CCNB2/MAD2L1/PLK1/CCNB1/CDK1/CDC25A/CDC25C/AURKA/PKMYT1	11
hsa04115	p53 signaling pathway	9/158	73/8145	1.0405e-05	0.000412039	0.000389914	CCNB2/RRM2/CCNB1/CDK1/GTSE1/CHEK1/CCNE1/PMAIP1/SERPINB5	9
hsa04218	Cellular senescence	12/158	156/8145	4.72526e-05	0.00155934	0.00147561	CCNA2/CCNB2/FOXM1/CCNB1/CDK1/MYBL2/CHEK1/CDC25A/CCNE1/E2F1/E2F2/EIF4EBP1	12
hsa03440	Homologous recombination	6/158	41/8145	0.000124247	0.0035144	0.0033257	RAD51/RAD54L/BRCA1/EME1/XRCC2/BRIP1	6
hsa05166	Human T-cell leukemia virus 1 infection	13/158	222/8145	0.000363292	0.00899148	0.00850868	CCNA2/CDC20/CCNB2/MAD2L1/BUB1B/ESPL1/CHEK1/CCNE1/E2F1/E2F2/SLC2A1/PTTG1/FOSL1	13
hsa03460	Fanconi anemia pathway	6/158	54/8145	0.000579905	0.0127579	0.0120729	RAD51/FANCI/UBE2T/BRCA1/EME1/BRIP1	6
hsa01523	Antifolate resistance	4/158	30/8145	0.00252129	0.0491577	0.0465181	TYMS/GGH/FOLR1/ABCC2	4
hsa05206	MicroRNAs in cancer	14/158	310/8145	0.00273098	0.0491577	0.0465181	KIF23/CDCA5/CDC25A/CDC25C/BRCA1/CCNE1/E2F1/STMN1/E2F2/EZH2/FSCN1/IGF2BP1/MIRLET7D/SERPINB5	14
hsa03410	Base excision repair	4/158	33/8145	0.00359889	0.0593817	0.0561932	FEN1/PCNA/POLE2/NEIL3	4
hsa04210	Apoptosis	8/158	136/8145	0.00485526	0.0739494	0.0699787	BIRC5/TUBA1B/TUBA1C/LMNB1/CTSV/LMNB2/PMAIP1/CTSH	8
hsa03430	Mismatch repair	3/158	23/8145	0.00953981	0.13492	0.127676	EXO1/RFC4/PCNA	3
hsa00790	Folate biosynthesis	3/158	26/8145	0.0134251	0.166233	0.157307	GGH/ALPL/AKR1B10	3
hsa01524	Platinum drug resistance	5/158	73/8145	0.0134329	0.166233	0.157307	BIRC5/TOP2A/BRCA1/PMAIP1/ABCC2	5
hsa04530	Tight junction	8/158	169/8145	0.0168867	0.196681	0.18612	TUBA1B/TUBA1C/PCNA/CD1C/CD1A/CLDN2/CLDN18/CLDN6	8
hsa00240	Pyrimidine metabolism	4/158	58/8145	0.0257244	0.282968	0.267774	RRM2/TYMS/TK1/UCK2	4
hsa05222	Small cell lung cancer	5/158	92/8145	0.0329015	0.342868	0.324458	CKS1B/CCNE1/E2F1/E2F2/CKS2	5
hsa00450	Selenocompound metabolism	2/158	17/8145	0.0420284	0.416081	0.39374	TXNRD1/INMT	2
hsa00670	One carbon pool by folate	2/158	20/8145	0.0565498	0.533184	0.504555	TYMS/MTHFD2	2
hsa03420	Nucleotide excision repair	3/158	47/8145	0.0624805	0.562325	0.532131	RFC4/PCNA/POLE2	3
hsa01240	Biosynthesis of cofactors	6/158	153/8145	0.0768538	0.620438	0.587124	MTHFD2/GGH/GCLC/PSAT1/HSD17B6/ALPL	6
hsa01232	Nucleotide metabolism	4/158	85/8145	0.0827548	0.620438	0.587124	RRM2/TYMS/TK1/UCK2	4
hsa04610	Complement and coagulation cascades	4/158	85/8145	0.0827548	0.620438	0.587124	C7/C4BPA/SERPIND1/FGB	4
hsa00592	alpha-Linolenic acid metabolism	2/158	25/8145	0.0839014	0.620438	0.587124	PLA2G10/PLA2G1B	2
hsa05160	Hepatitis C	6/158	157/8145	0.0846052	0.620438	0.587124	E2F1/E2F2/CXCL10/CLDN2/CLDN18/CLDN6	6
hsa04976	Bile secretion	4/158	89/8145	0.0941928	0.64782	0.613035	SLC2A1/SCTR/ABCC2/AQP4	4
hsa05161	Hepatitis B	6/158	162/8145	0.0948827	0.64782	0.613035	CCNA2/BIRC5/PCNA/CCNE1/E2F1/E2F2	6
hsa00480	Glutathione metabolism	3/158	58/8145	0.102259	0.67408	0.637885	RRM2/GCLC/G6PD	3
hsa00591	Linoleic acid metabolism	2/158	29/8145	0.108072	0.67408	0.637885	PLA2G10/PLA2G1B	2
hsa00590	Arachidonic acid metabolism	3/158	61/8145	0.114505	0.67408	0.637885	PLA2G10/PLA2G1B/ALOX15B	3
hsa05170	Human immunodeficiency virus 1 infection	7/158	212/8145	0.117908	0.67408	0.637885	CCNB2/CCNB1/CDK1/CHEK1/CDC25C/APOBEC3B/GNG4	7
hsa05207	Chemical carcinogenesis - receptor activation	7/158	212/8145	0.117908	0.67408	0.637885	CDC6/BIRC5/KPNA2/CDC25A/E2F1/EIF4EBP1/MIRLET7D	7
hsa05215	Prostate cancer	4/158	97/8145	0.119156	0.67408	0.637885	CCNE1/E2F1/E2F2/TMPRSS2	4
hsa04215	Apoptosis - multiple species	2/158	32/8145	0.127254	0.699898	0.662317	BIRC5/PMAIP1	2
hsa05230	Central carbon metabolism in cancer	3/158	70/8145	0.154229	0.825335	0.781019	SLC2A1/SLC7A5/G6PD	3
hsa04145	Phagosome	5/158	152/8145	0.172774	0.861614	0.815349	TUBA1B/TUBA1C/SFTPD/SFTPA1/SFTPA2	5
hsa00920	Sulfur metabolism	1/158	10/8145	0.177987	0.861614	0.815349	SELENBP1	1
hsa05133	Pertussis	3/158	76/8145	0.182785	0.861614	0.815349	C4BPA/SFTPA1/SFTPA2	3
hsa05212	Pancreatic cancer	3/158	76/8145	0.182785	0.861614	0.815349	RAD51/E2F1/E2F2	3
hsa05412	Arrhythmogenic right ventricular cardiomyopathy	3/158	77/8145	0.187677	0.861614	0.815349	CACNA2D2/DSP/PKP2	3
hsa05219	Bladder cancer	2/158	41/8145	0.188588	0.861614	0.815349	E2F1/E2F2	2
hsa05169	Epstein-Barr virus infection	6/158	202/8145	0.198485	0.861614	0.815349	CCNA2/CCNE1/E2F1/E2F2/ISG15/CXCL10	6
hsa00983	Drug metabolism - other enzymes	3/158	80/8145	0.202551	0.861614	0.815349	RRM2/TK1/UCK2	3
hsa04975	Fat digestion and absorption	2/158	43/8145	0.20274	0.861614	0.815349	PLA2G10/PLA2G1B	2
hsa05203	Viral carcinogenesis	6/158	204/8145	0.204524	0.861614	0.815349	CCNA2/CDC20/CDK1/CHEK1/CCNE1/PMAIP1	6
hsa04962	Vasopressin-regulated water reabsorption	2/158	44/8145	0.209862	0.865679	0.819196	AQP3/AQP4	2
hsa02010	ABC transporters	2/158	45/8145	0.217008	0.87689	0.829806	ABCA3/ABCC2	2
hsa03450	Non-homologous end-joining	1/158	13/8145	0.224965	0.890861	0.843026	FEN1	1
hsa04540	Gap junction	3/158	88/8145	0.243414	0.900868	0.852496	CDK1/TUBA1B/TUBA1C	3
hsa00565	Ether lipid metabolism	2/158	49/8145	0.245777	0.900868	0.852496	PLA2G10/PLA2G1B	2
hsa04068	FoxO signaling pathway	4/158	131/8145	0.249433	0.900868	0.852496	CCNB2/PLK1/CCNB1/PLK4	4
hsa04142	Lysosome	4/158	132/8145	0.253683	0.900868	0.852496	CTSV/NAPSA/CTSH/CTSE	4
hsa00604	Glycosphingolipid biosynthesis - ganglio series	1/158	15/8145	0.254791	0.900868	0.852496	ST3GAL5	1
hsa00730	Thiamine metabolism	1/158	15/8145	0.254791	0.900868	0.852496	ALPL	1
hsa00270	Cysteine and methionine metabolism	2/158	51/8145	0.260225	0.903939	0.855402	GCLC/PSAT1	2
hsa00430	Taurine and hypotaurine metabolism	1/158	16/8145	0.269274	0.919244	0.869886	FMO5	1
hsa04120	Ubiquitin mediated proteolysis	4/158	142/8145	0.296901	0.996381	0.94288	CDC20/BRCA1/UBE2C/UBE2S	4
hsa04972	Pancreatic secretion	3/158	102/8145	0.317402	0.998268	0.944666	PLA2G10/SCTR/PLA2G1B	3
hsa04978	Mineral absorption	2/158	60/8145	0.325061	0.998268	0.944666	SLC26A9/SLC34A2	2
hsa00561	Glycerolipid metabolism	2/158	61/8145	0.332198	0.998268	0.944666	LPL/AKR1B10	2
hsa05130	Pathogenic Escherichia coli infection	5/158	197/8145	0.335498	0.998268	0.944666	TUBA1B/TUBA1C/CLDN2/CLDN18/CLDN6	5
hsa00310	Lysine degradation	2/158	63/8145	0.346408	0.998268	0.944666	EZH2/PLOD2	2
hsa04066	HIF-1 signaling pathway	3/158	109/8145	0.35473	0.998268	0.944666	SLC2A1/EIF4EBP1/EGLN3	3
hsa05221	Acute myeloid leukemia	2/158	67/8145	0.374518	0.998268	0.944666	CCNA2/EIF4EBP1	2
hsa04670	Leukocyte transendothelial migration	3/158	114/8145	0.381259	0.998268	0.944666	CLDN2/CLDN18/CLDN6	3
hsa00830	Retinol metabolism	2/158	68/8145	0.381471	0.998268	0.944666	ADH1B/HSD17B6	2
hsa05211	Renal cell carcinoma	2/158	69/8145	0.388392	0.998268	0.944666	SLC2A1/EGLN3	2
hsa04622	RIG-I-like receptor signaling pathway	2/158	70/8145	0.39528	0.998268	0.944666	ISG15/CXCL10	2
hsa04950	Maturity onset diabetes of the young	1/158	26/8145	0.399568	0.998268	0.944666	FOXA2	1
hsa00982	Drug metabolism - cytochrome P450	2/158	72/8145	0.408947	0.998268	0.944666	ADH1B/FMO5	2
hsa05218	Melanoma	2/158	72/8145	0.408947	0.998268	0.944666	E2F1/E2F2	2
hsa05223	Non-small cell lung cancer	2/158	72/8145	0.408947	0.998268	0.944666	E2F1/E2F2	2
hsa00601	Glycosphingolipid biosynthesis - lacto and neolacto series	1/158	27/8145	0.411253	0.998268	0.944666	ABO	1
hsa05214	Glioma	2/158	75/8145	0.429164	0.998268	0.944666	E2F1/E2F2	2
hsa05220	Chronic myeloid leukemia	2/158	76/8145	0.435823	0.998268	0.944666	E2F1/E2F2	2
hsa00030	Pentose phosphate pathway	1/158	30/8145	0.444968	0.998268	0.944666	G6PD	1
hsa00052	Galactose metabolism	1/158	31/8145	0.455775	0.998268	0.944666	AKR1B10	1
hsa05310	Asthma	1/158	31/8145	0.455775	0.998268	0.944666	FCER1A	1
hsa05171	Coronavirus disease - COVID-19	5/158	232/8145	0.470237	0.998268	0.944666	C7/TMPRSS2/ISG15/CXCL10/FGB	5
hsa00051	Fructose and mannose metabolism	1/158	33/8145	0.476764	0.998268	0.944666	AKR1B10	1
hsa04270	Vascular smooth muscle contraction	3/158	134/8145	0.48411	0.998268	0.944666	PLA2G10/PLA2G1B/ADM	3
hsa00040	Pentose and glucuronate interconversions	1/158	34/8145	0.486956	0.998268	0.944666	AKR1B10	1
hsa05210	Colorectal cancer	2/158	86/8145	0.499989	0.998268	0.944666	BIRC5/PMAIP1	2
hsa00350	Tyrosine metabolism	1/158	36/8145	0.50675	0.998268	0.944666	ADH1B	1
hsa04960	Aldosterone-regulated sodium reabsorption	1/158	37/8145	0.516361	0.998268	0.944666	SCNN1B	1
hsa04970	Salivary secretion	2/158	92/8145	0.5362	0.998268	0.944666	DMBT1/AQP5	2
hsa00260	Glycine, serine and threonine metabolism	1/158	40/8145	0.544091	0.998268	0.944666	PSAT1	1
hsa05224	Breast cancer	3/158	147/8145	0.546505	0.998268	0.944666	BRCA1/E2F1/E2F2	3
hsa04657	IL-17 signaling pathway	2/158	94/8145	0.547868	0.998268	0.944666	FOSL1/CXCL10	2
hsa04216	Ferroptosis	1/158	41/8145	0.552978	0.998268	0.944666	GCLC	1
hsa04514	Cell adhesion molecules	3/158	149/8145	0.555714	0.998268	0.944666	CLDN2/CLDN18/CLDN6	3
hsa05226	Gastric cancer	3/158	149/8145	0.555714	0.998268	0.944666	CCNE1/E2F1/E2F2	3
hsa00380	Tryptophan metabolism	1/158	42/8145	0.561694	0.998268	0.944666	INMT	1
hsa00071	Fatty acid degradation	1/158	43/8145	0.57024	0.998268	0.944666	ADH1B	1
hsa00564	Glycerophospholipid metabolism	2/158	98/8145	0.570586	0.998268	0.944666	PLA2G10/PLA2G1B	2
hsa01522	Endocrine resistance	2/158	98/8145	0.570586	0.998268	0.944666	E2F1/E2F2	2
hsa05231	Choline metabolism in cancer	2/158	98/8145	0.570586	0.998268	0.944666	EIF4EBP1/SLC22A3	2
hsa04640	Hematopoietic cell lineage	2/158	99/8145	0.576136	0.998268	0.944666	CD1C/CD1A	2
hsa04061	Viral protein interaction with cytokine and cytokine receptor	2/158	100/8145	0.581634	0.998268	0.944666	CXCL10/CXCL14	2
hsa04933	AGE-RAGE signaling pathway in diabetic complications	2/158	100/8145	0.581634	0.998268	0.944666	VEGFD/AGER	2
hsa04934	Cushing syndrome	3/158	155/8145	0.582669	0.998268	0.944666	CCNE1/E2F1/E2F2	3
hsa05146	Amoebiasis	2/158	102/8145	0.592473	0.998268	0.944666	CD1C/CD1A	2
hsa00620	Pyruvate metabolism	1/158	47/8145	0.602802	0.998268	0.944666	ADH1B	1
hsa00520	Amino sugar and nucleotide sugar metabolism	1/158	49/8145	0.618151	0.998268	0.944666	CHIA	1
hsa04672	Intestinal immune network for IgA production	1/158	49/8145	0.618151	0.998268	0.944666	PIGR	1
hsa05030	Cocaine addiction	1/158	49/8145	0.618151	0.998268	0.944666	PPP1R1B	1
hsa03013	Nucleocytoplasmic transport	2/158	108/8145	0.623737	0.998268	0.944666	KPNA2/ALYREF	2
hsa04979	Cholesterol metabolism	1/158	50/8145	0.625603	0.998268	0.944666	LPL	1
hsa04310	Wnt signaling pathway	3/158	167/8145	0.633405	0.998268	0.944666	FOSL1/DKK1/WIF1	3
hsa05225	Hepatocellular carcinoma	3/158	168/8145	0.637437	0.998268	0.944666	E2F1/E2F2/TXNRD1	3
hsa05163	Human cytomegalovirus infection	4/158	225/8145	0.640065	0.998268	0.944666	E2F1/E2F2/EIF4EBP1/GNG4	4
hsa04668	TNF signaling pathway	2/158	112/8145	0.643539	0.998268	0.944666	VEGFD/CXCL10	2
hsa05164	Influenza A	3/158	171/8145	0.649346	0.998268	0.944666	KPNA2/TMPRSS2/CXCL10	3
hsa01200	Carbon metabolism	2/158	115/8145	0.657848	0.998268	0.944666	PSAT1/G6PD	2
hsa04726	Serotonergic synapse	2/158	115/8145	0.657848	0.998268	0.944666	GNG4/ALOX15B	2
hsa04014	Ras signaling pathway	4/158	235/8145	0.673783	0.998268	0.944666	PLA2G10/GNG4/PLA2G1B/VEGFD	4
hsa04152	AMPK signaling pathway	2/158	120/8145	0.680678	0.998268	0.944666	CCNA2/EIF4EBP1	2
hsa00140	Steroid hormone biosynthesis	1/158	61/8145	0.698624	0.998268	0.944666	HSD17B6	1
hsa04213	Longevity regulating pathway - multiple species	1/158	62/8145	0.704515	0.998268	0.944666	FOXA2	1
hsa03250	Viral life cycle - HIV-1	1/158	63/8145	0.71029	0.998268	0.944666	APOBEC3B	1
hsa04623	Cytosolic DNA-sensing pathway	1/158	63/8145	0.71029	0.998268	0.944666	CXCL10	1
hsa04926	Relaxin signaling pathway	2/158	129/8145	0.718644	0.998268	0.944666	GNG4/VEGFD	2
hsa04062	Chemokine signaling pathway	3/158	192/8145	0.724935	0.998268	0.944666	GNG4/CXCL10/CXCL14	3
hsa04728	Dopaminergic synapse	2/158	132/8145	0.730434	0.998268	0.944666	GNG4/PPP1R1B	2
hsa05167	Kaposi sarcoma-associated herpesvirus infection	3/158	194/8145	0.73143	0.998268	0.944666	E2F1/E2F2/GNG4	3
hsa00010	Glycolysis / Gluconeogenesis	1/158	67/8145	0.732294	0.998268	0.944666	ADH1B	1
hsa04664	Fc epsilon RI signaling pathway	1/158	68/8145	0.73753	0.998268	0.944666	FCER1A	1
hsa04920	Adipocytokine signaling pathway	1/158	69/8145	0.742664	0.998268	0.944666	SLC2A1	1
hsa05031	Amphetamine addiction	1/158	69/8145	0.742664	0.998268	0.944666	PPP1R1B	1
hsa04137	Mitophagy - animal	1/158	72/8145	0.757476	0.998268	0.944666	E2F1	1
hsa05415	Diabetic cardiomyopathy	3/158	203/8145	0.759187	0.998268	0.944666	SLC2A1/G6PD/AGER	3
hsa05012	Parkinson disease	4/158	266/8145	0.764181	0.998268	0.944666	TUBA1B/TUBA1C/UCHL1/LRRK2	4
hsa01230	Biosynthesis of amino acids	1/158	75/8145	0.77144	0.998268	0.944666	PSAT1	1
hsa03320	PPAR signaling pathway	1/158	75/8145	0.77144	0.998268	0.944666	LPL	1
hsa05165	Human papillomavirus infection	5/158	331/8145	0.775828	0.998268	0.944666	CCNA2/CCNE1/E2F1/EIF4EBP1/ISG15	5
hsa00980	Metabolism of xenobiotics by cytochrome P450	1/158	78/8145	0.784606	0.998268	0.944666	ADH1B	1
hsa01521	EGFR tyrosine kinase inhibitor resistance	1/158	79/8145	0.788824	0.998268	0.944666	EIF4EBP1	1
hsa04810	Regulation of actin cytoskeleton	3/158	218/8145	0.800291	0.998268	0.944666	DIAPH3/IQGAP3/PFN2	3
hsa04150	mTOR signaling pathway	2/158	156/8145	0.810474	0.998268	0.944666	EIF4EBP1/SLC7A5	2
hsa04012	ErbB signaling pathway	1/158	85/8145	0.812467	0.998268	0.944666	EIF4EBP1	1
hsa04742	Taste transduction	1/158	86/8145	0.816143	0.998268	0.944666	SCNN1B	1
hsa04911	Insulin secretion	1/158	86/8145	0.816143	0.998268	0.944666	SLC2A1	1
hsa04260	Cardiac muscle contraction	1/158	87/8145	0.819747	0.998268	0.944666	CACNA2D2	1
hsa04512	ECM-receptor interaction	1/158	88/8145	0.823282	0.998268	0.944666	HMMR	1
hsa04151	PI3K-Akt signaling pathway	5/158	354/8145	0.823318	0.998268	0.944666	BRCA1/CCNE1/EIF4EBP1/GNG4/VEGFD	5
hsa04211	Longevity regulating pathway	1/158	89/8145	0.826747	0.998268	0.944666	EIF4EBP1	1
hsa04727	GABAergic synapse	1/158	89/8145	0.826747	0.998268	0.944666	GNG4	1
hsa05410	Hypertrophic cardiomyopathy	1/158	90/8145	0.830145	0.998268	0.944666	CACNA2D2	1
hsa05032	Morphine addiction	1/158	91/8145	0.833477	0.998268	0.944666	GNG4	1
hsa05414	Dilated cardiomyopathy	1/158	96/8145	0.849186	0.998268	0.944666	CACNA2D2	1
hsa03015	mRNA surveillance pathway	1/158	97/8145	0.852147	0.998268	0.944666	ALYREF	1
hsa04713	Circadian entrainment	1/158	97/8145	0.852147	0.998268	0.944666	GNG4	1
hsa05132	Salmonella infection	3/158	249/8145	0.8669	0.998268	0.944666	TUBA1B/TUBA1C/PFN2	3
hsa04974	Protein digestion and absorption	1/158	103/8145	0.868735	0.998268	0.944666	COL11A1	1
hsa04620	Toll-like receptor signaling pathway	1/158	104/8145	0.871314	0.998268	0.944666	CXCL10	1
hsa05010	Alzheimer disease	5/158	384/8145	0.872795	0.998268	0.944666	TUBA1B/TUBA1C/LPL/DKK1/AGER	5
hsa04928	Parathyroid hormone synthesis, secretion and action	1/158	106/8145	0.876322	0.998268	0.944666	SLC34A2	1
hsa04922	Glucagon signaling pathway	1/158	107/8145	0.878752	0.998268	0.944666	SLC2A1	1
hsa04931	Insulin resistance	1/158	108/8145	0.881136	0.998268	0.944666	SLC2A1	1
hsa05034	Alcoholism	2/158	187/8145	0.882351	0.998268	0.944666	GNG4/PPP1R1B	2
hsa04613	Neutrophil extracellular trap formation	2/158	190/8145	0.887781	0.998268	0.944666	AGER/FGB	2
hsa04725	Cholinergic synapse	1/158	113/8145	0.892372	0.998268	0.944666	GNG4	1
hsa05202	Transcriptional misregulation in cancer	2/158	193/8145	0.892979	0.998268	0.944666	CCNA2/TMPRSS2	2
hsa04724	Glutamatergic synapse	1/158	114/8145	0.894489	0.998268	0.944666	GNG4	1
hsa05020	Prion disease	3/158	273/8145	0.904267	0.998268	0.944666	TUBA1B/TUBA1C/C7	3
hsa04071	Sphingolipid signaling pathway	1/158	119/8145	0.90447	0.998268	0.944666	FCER1A	1
hsa05022	Pathways of neurodegeneration - multiple diseases	6/158	476/8145	0.906806	0.998268	0.944666	TUBA1B/TUBA1C/UCHL1/LRRK2/DKK1/AGER	6
hsa04919	Thyroid hormone signaling pathway	1/158	121/8145	0.908194	0.998268	0.944666	SLC2A1	1
hsa04611	Platelet activation	1/158	124/8145	0.913512	0.998268	0.944666	FGB	1
hsa04015	Rap1 signaling pathway	2/158	210/8145	0.918462	0.998268	0.944666	PFN2/VEGFD	2
hsa00230	Purine metabolism	1/158	128/8145	0.920129	0.998268	0.944666	RRM2	1
hsa04380	Osteoclast differentiation	1/158	128/8145	0.920129	0.998268	0.944666	FOSL1	1
hsa04080	Neuroactive ligand-receptor interaction	4/158	362/8145	0.925963	0.998268	0.944666	SCTR/ADM/GAL/NMU	4
hsa05014	Amyotrophic lateral sclerosis	4/158	364/8145	0.927877	0.998268	0.944666	TUBA1B/TUBA1C/ALYREF/PFN2	4
hsa04010	MAPK signaling pathway	3/158	294/8145	0.928937	0.998268	0.944666	STMN1/CACNA2D2/VEGFD	3
hsa04060	Cytokine-cytokine receptor interaction	3/158	295/8145	0.929952	0.998268	0.944666	CXCL17/CXCL10/CXCL14	3
hsa05322	Systemic lupus erythematosus	1/158	136/8145	0.931892	0.998268	0.944666	C7	1
hsa04910	Insulin signaling pathway	1/158	137/8145	0.933235	0.998268	0.944666	EIF4EBP1	1
hsa04371	Apelin signaling pathway	1/158	139/8145	0.935844	0.998268	0.944666	GNG4	1
hsa05162	Measles	1/158	139/8145	0.935844	0.998268	0.944666	CCNE1	1
hsa04936	Alcoholic liver disease	1/158	142/8145	0.939568	0.998268	0.944666	ADH1B	1
hsa03040	Spliceosome	1/158	147/8145	0.945304	0.998268	0.944666	ALYREF	1
hsa04072	Phospholipase D signaling pathway	1/158	148/8145	0.946385	0.998268	0.944666	FCER1A	1
hsa04723	Retrograde endocannabinoid signaling	1/158	148/8145	0.946385	0.998268	0.944666	GNG4	1
hsa04261	Adrenergic signaling in cardiomyocytes	1/158	150/8145	0.948483	0.998268	0.944666	CACNA2D2	1
hsa04921	Oxytocin signaling pathway	1/158	154/8145	0.952437	0.998268	0.944666	CACNA2D2	1
hsa04390	Hippo signaling pathway	1/158	157/8145	0.955203	0.998268	0.944666	BIRC5	1
hsa04510	Focal adhesion	1/158	201/8145	0.981445	0.998268	0.944666	VEGFD	1
hsa05016	Huntington disease	2/158	306/8145	0.983813	0.998268	0.944666	TUBA1B/TUBA1C	2
hsa05417	Lipid and atherosclerosis	1/158	215/8145	0.985998	0.998268	0.944666	AGER	1
hsa04024	cAMP signaling pathway	1/158	221/8145	0.987591	0.998268	0.944666	PPP1R1B	1
hsa05208	Chemical carcinogenesis - reactive oxygen species	1/158	223/8145	0.988081	0.998268	0.944666	SLC26A9	1
hsa04020	Calcium signaling pathway	1/158	240/8145	0.99154	0.998268	0.944666	VEGFD	1
hsa05131	Shigellosis	1/158	247/8145	0.992656	0.998268	0.944666	PFN2	1
hsa04144	Endocytosis	1/158	251/8145	0.993226	0.998268	0.944666	FOLR1	1
hsa05168	Herpes simplex virus 1 infection	2/158	495/8145	0.999484	0.999484	0.945817	ALYREF/EIF4EBP1	2
